# Supplementary material
Source: Royal Society of Chemistry journal article supplement (https://www.rsc.org/suppdata/cc/1999/2059/906398f.doc)
Supplement: Supplementary file 1 [file 906398f.doc]

**Supplementary data**

**Bonded *peri*-Interactions Govern the Rate of Racemisation of Atropisomeric 8-Substituted 1-Naphthamides**

**Jonathan Clayden,* Catherine McCarthy and Madeleine Helliwell**

*Department of Chemistry, University of Manchester, Oxford Rd., Manchester, UK. M13 9PL. E-mail: j.p.clayden@man.ac.uk*


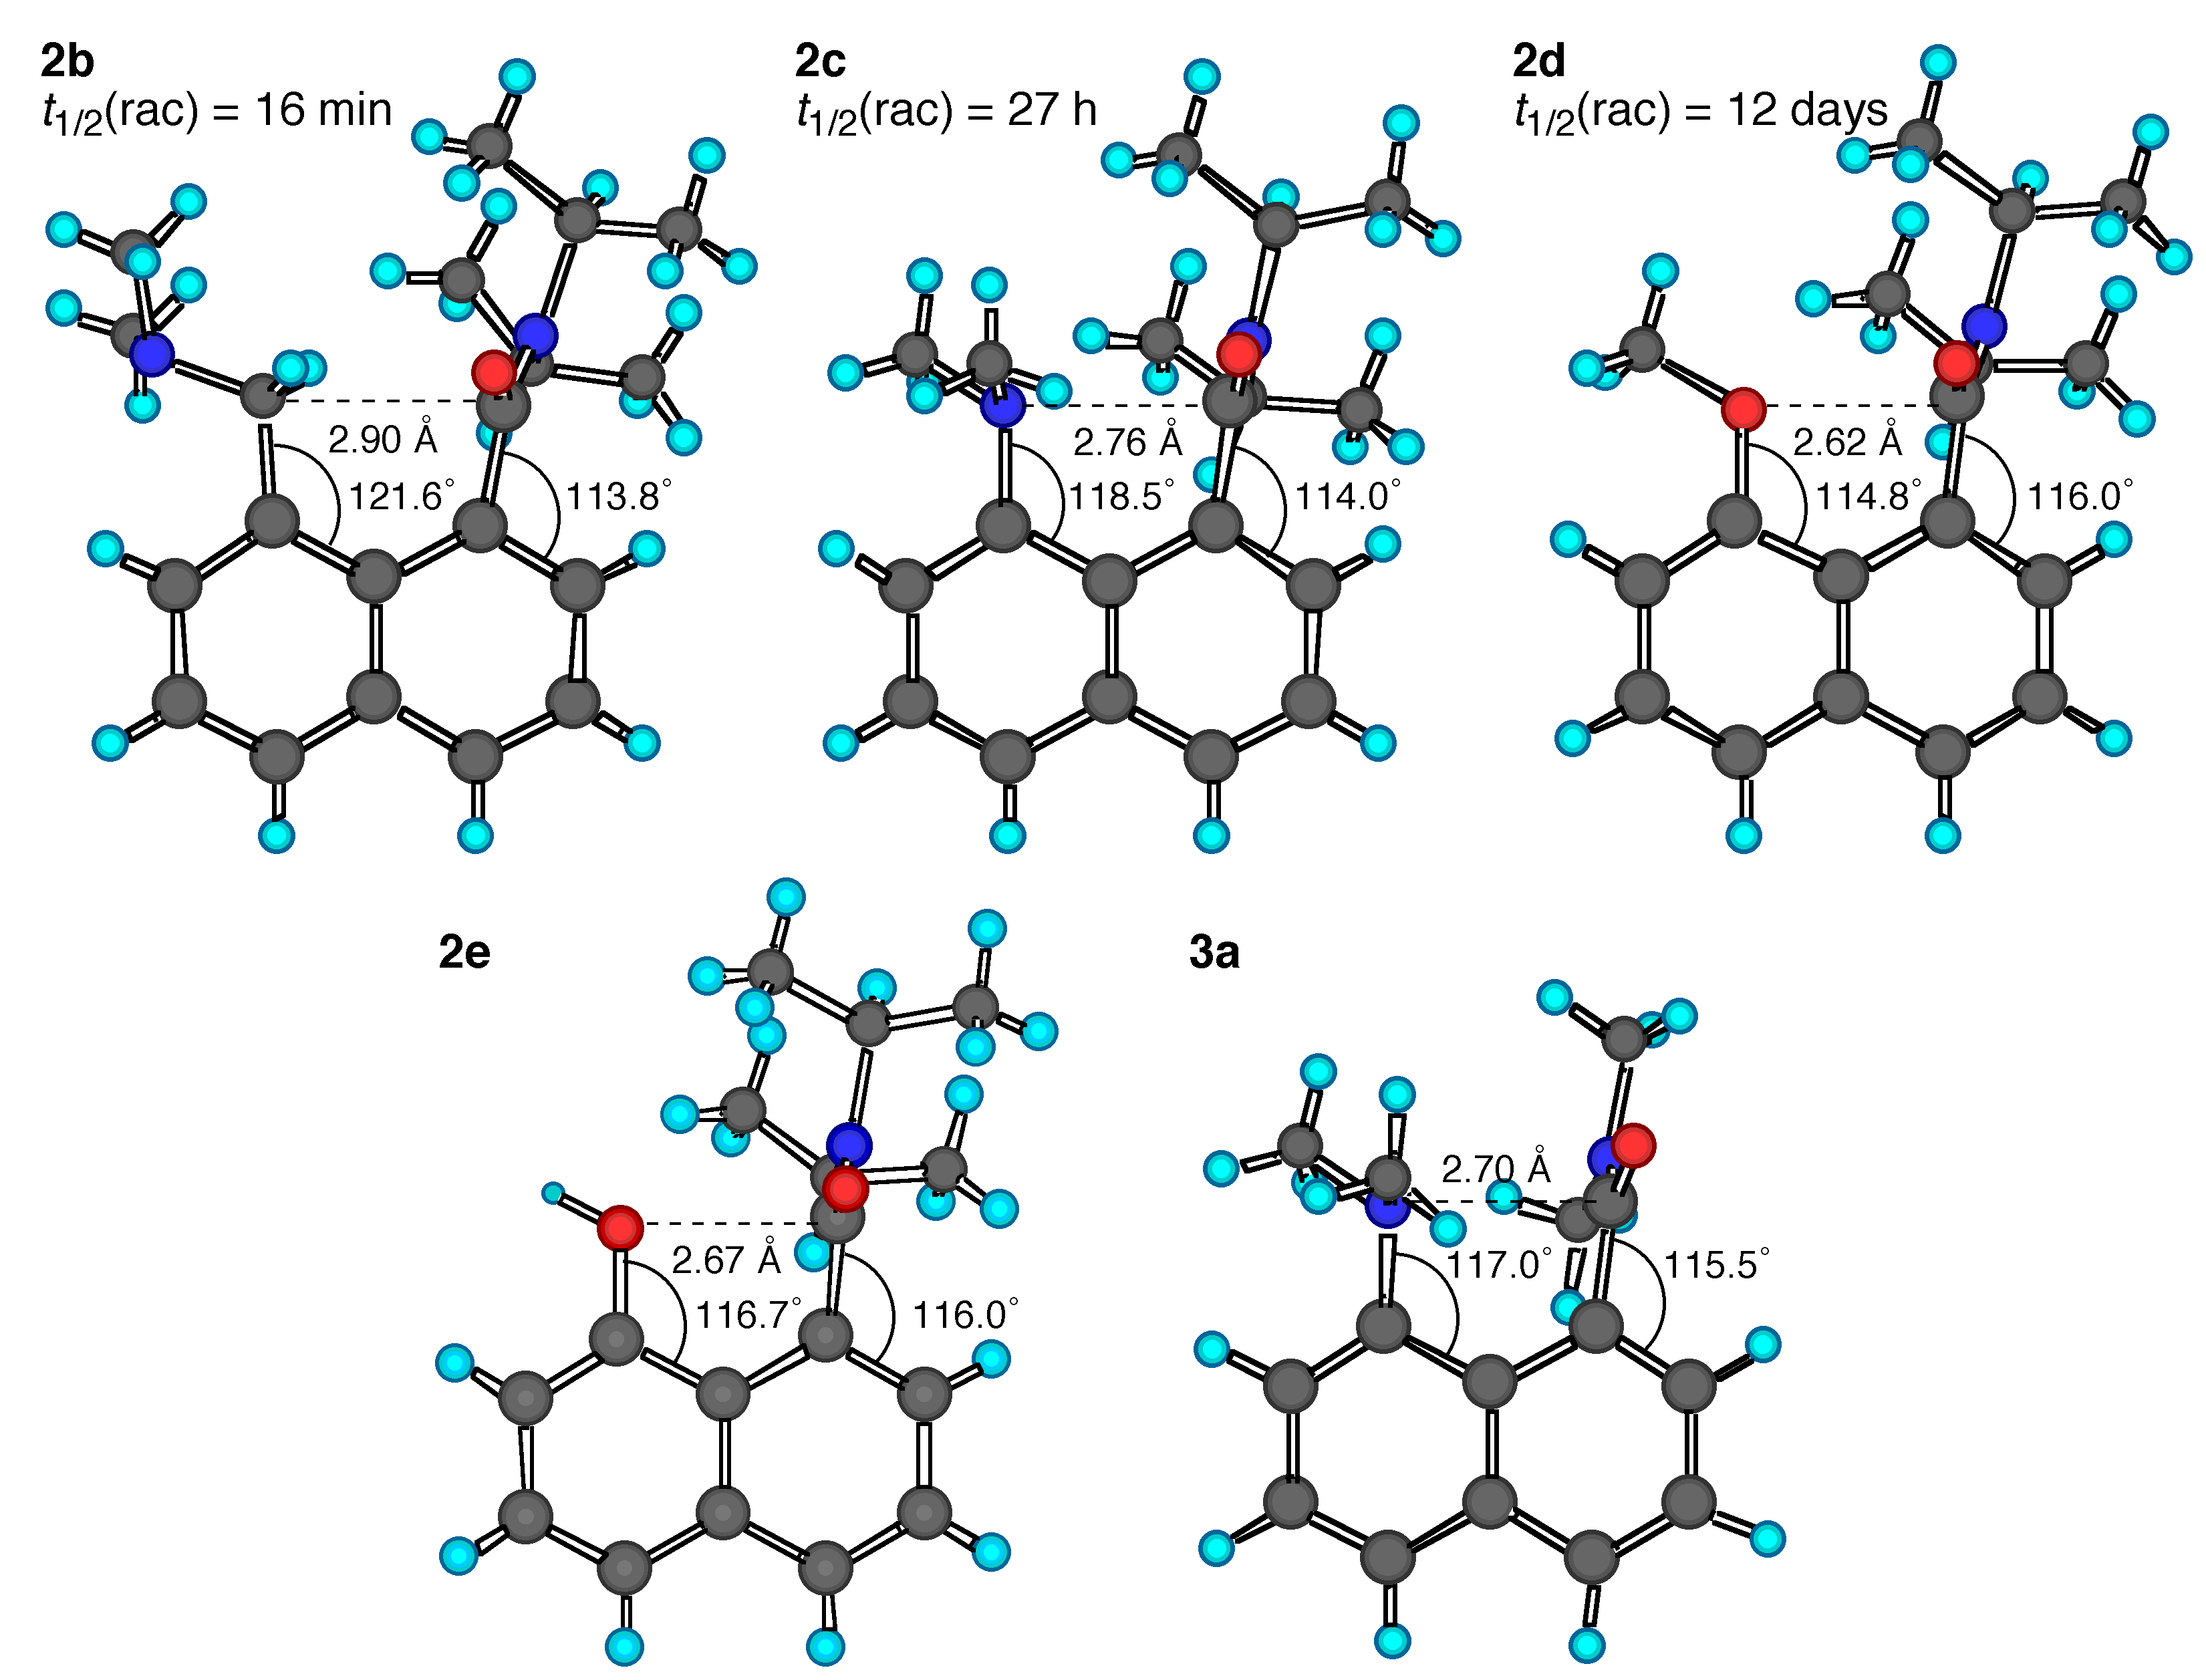


**Fig. 1** X-Ray crystal structures. *t*1/2(rac) = half-life for racemisation in solution at 20 °C.
